# Supplementary material for: Characterization of novel low passage primary and metastatic colorectal cancer cell lines
Source: PubMed Central journal article supplement (PMC4924731; doi:10.18632/oncotarget.7391), 2016-02-15

CNA JVE015

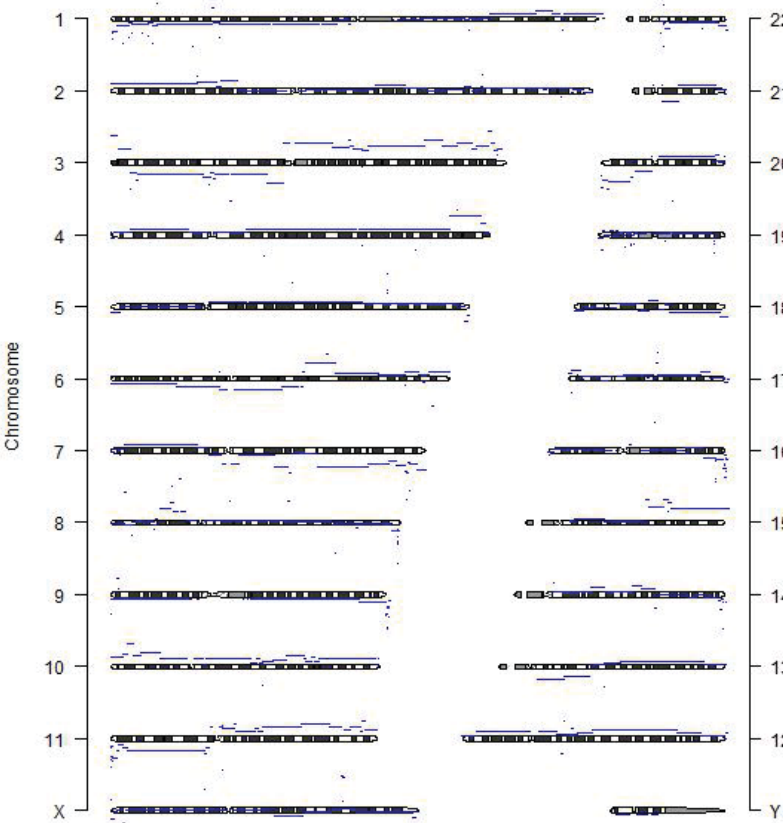

LAIR JVE015

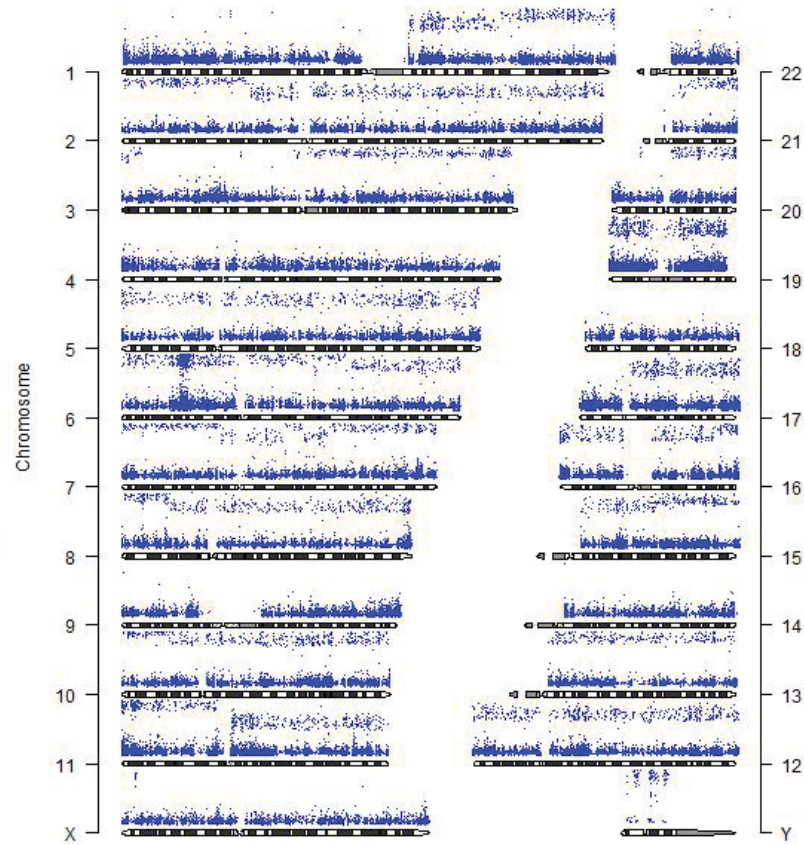

CNA JVE044

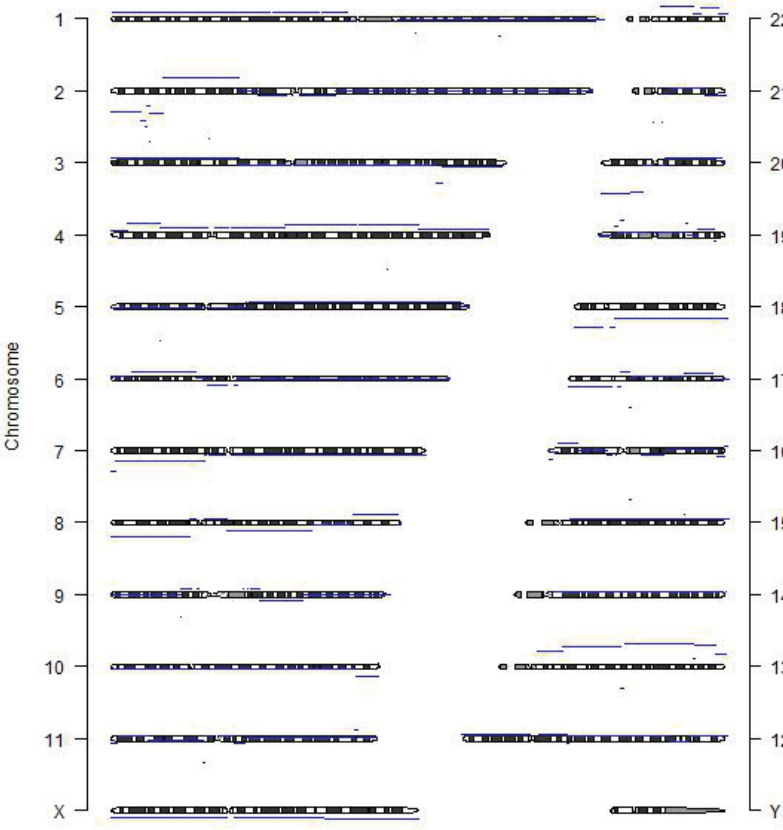

LAIR JVE044

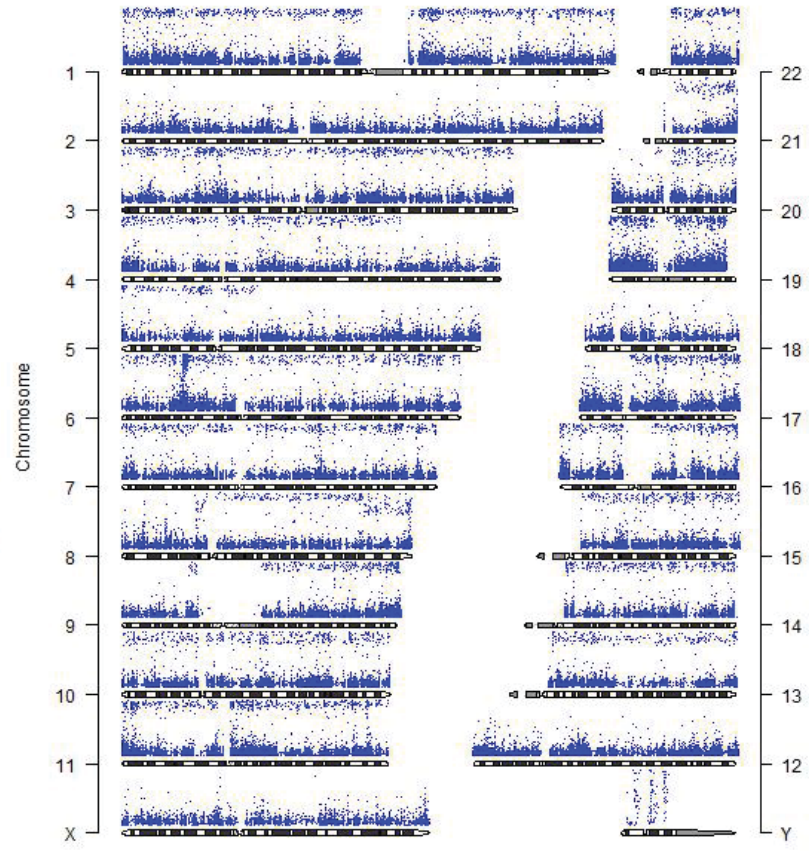

### CNA JVE059

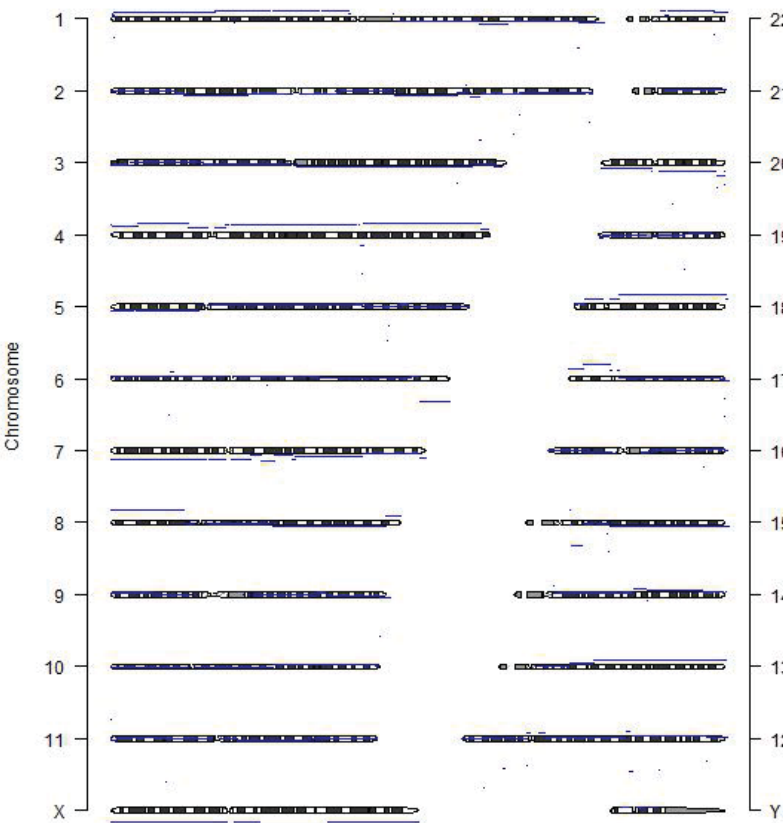

### LAIR JVE059

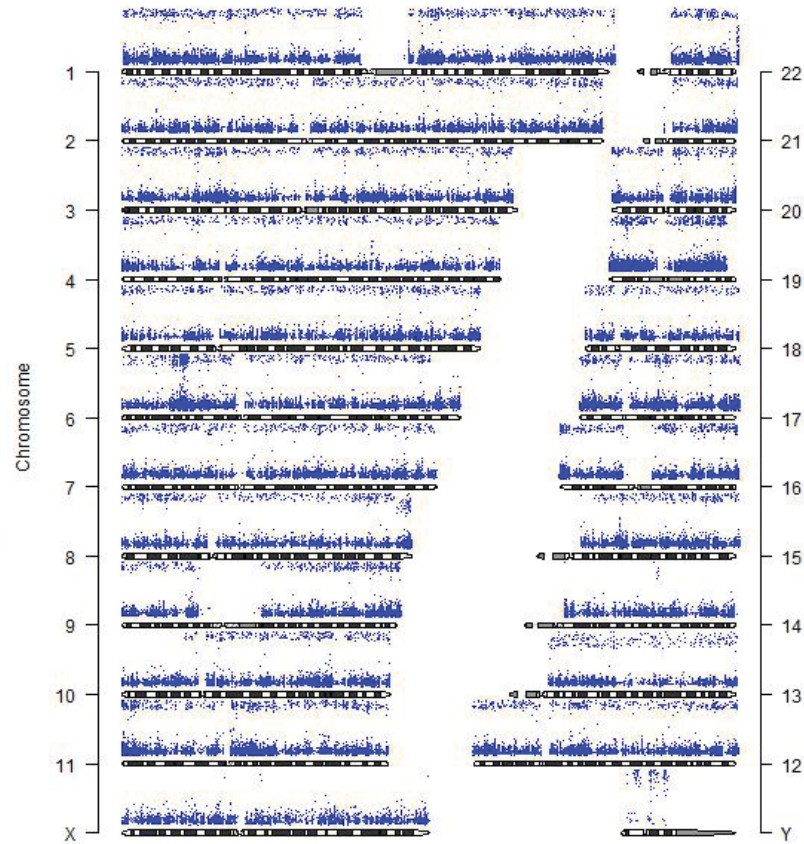

CNA JVE103

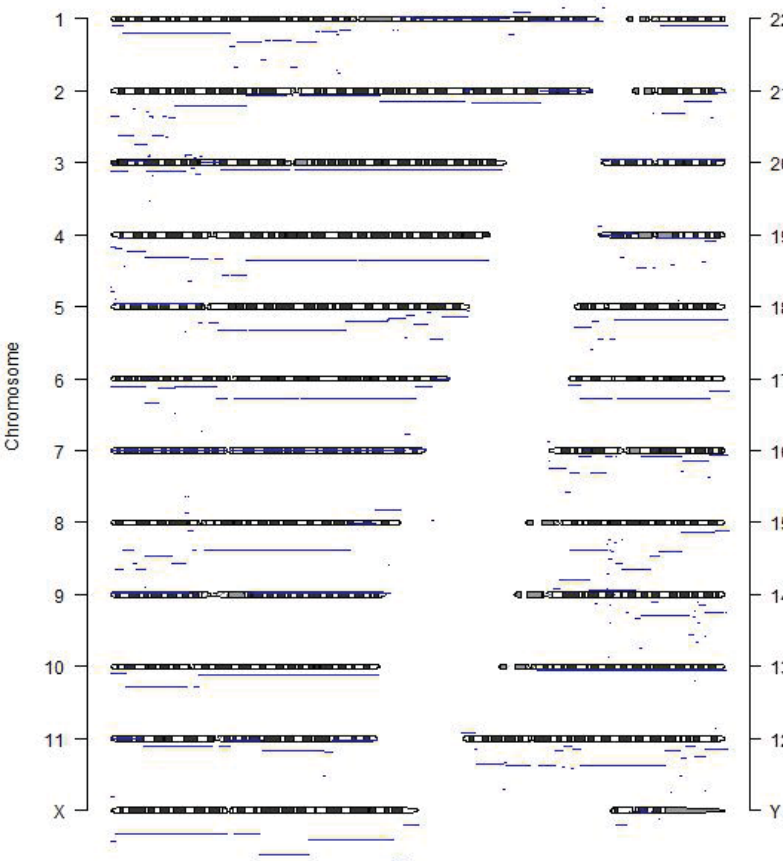

LAIR JVE103

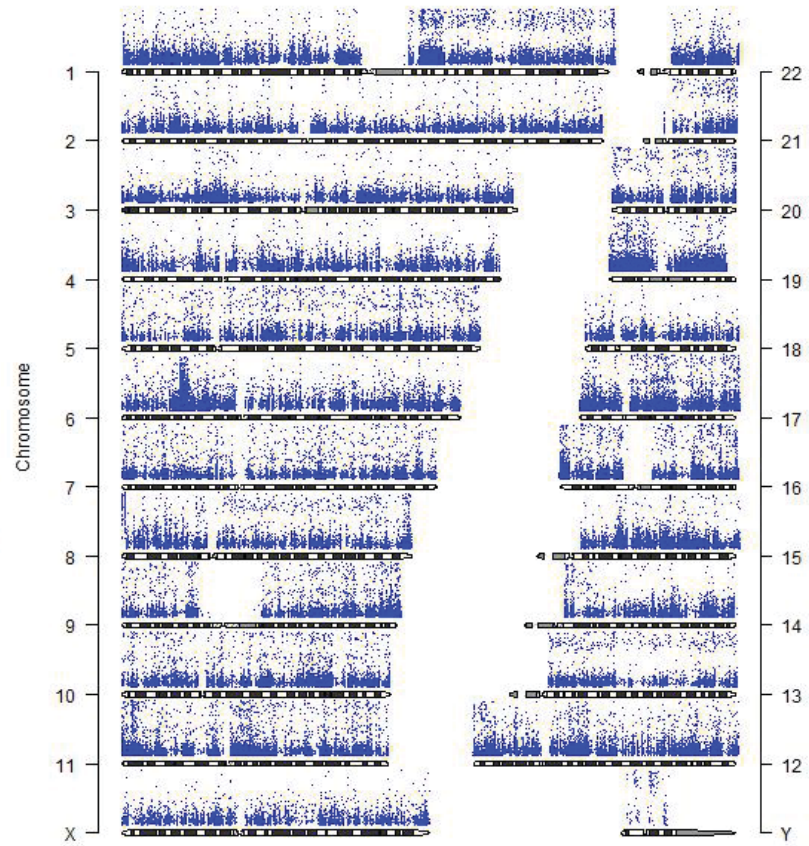

### CNA JVE109

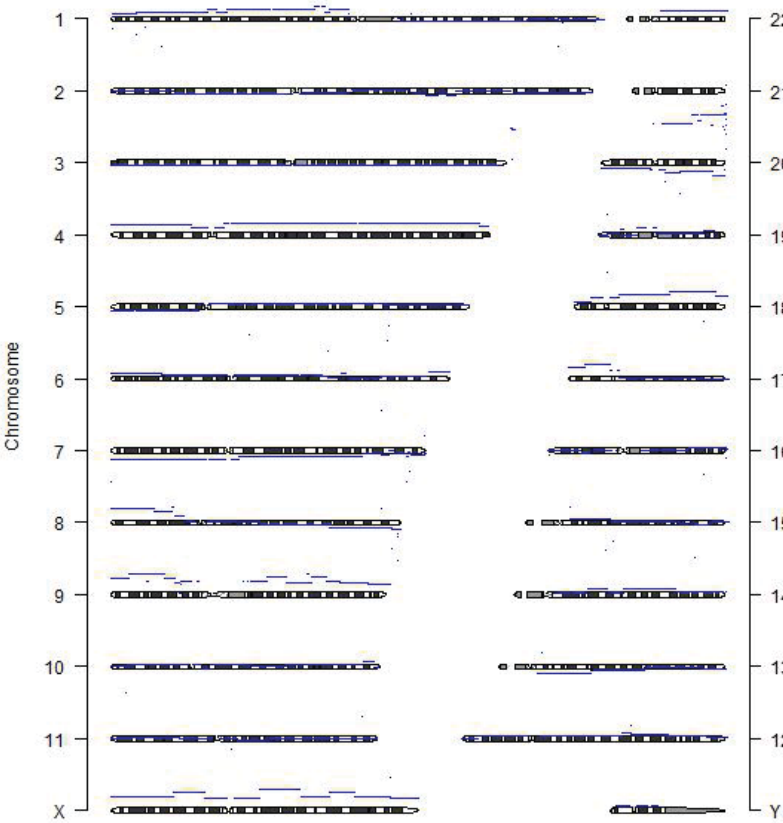

### LAIR JVE109

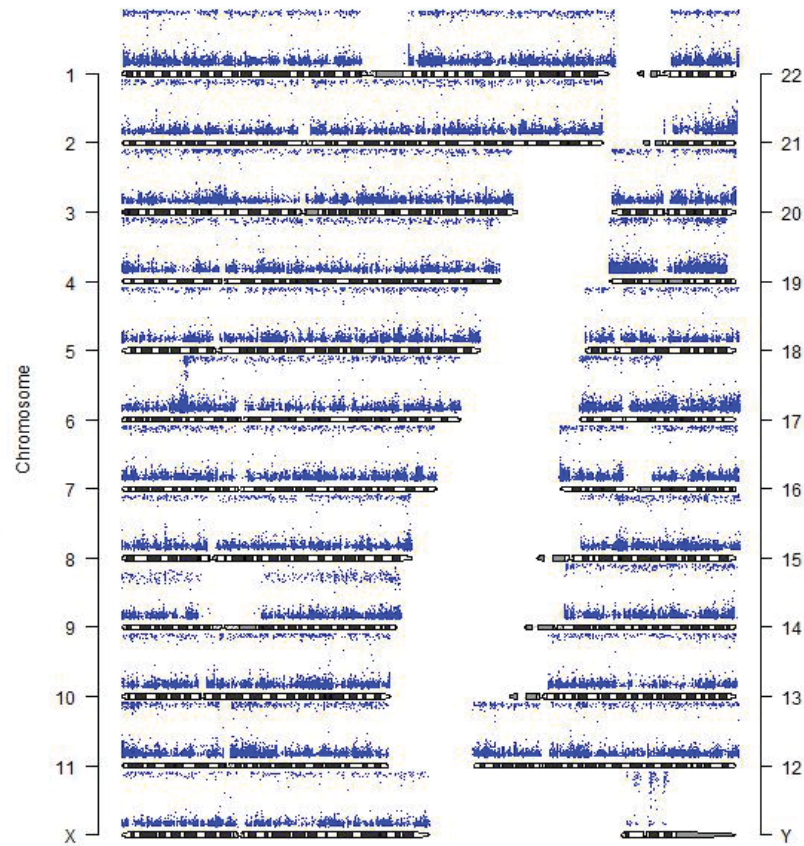

CNA JVE114

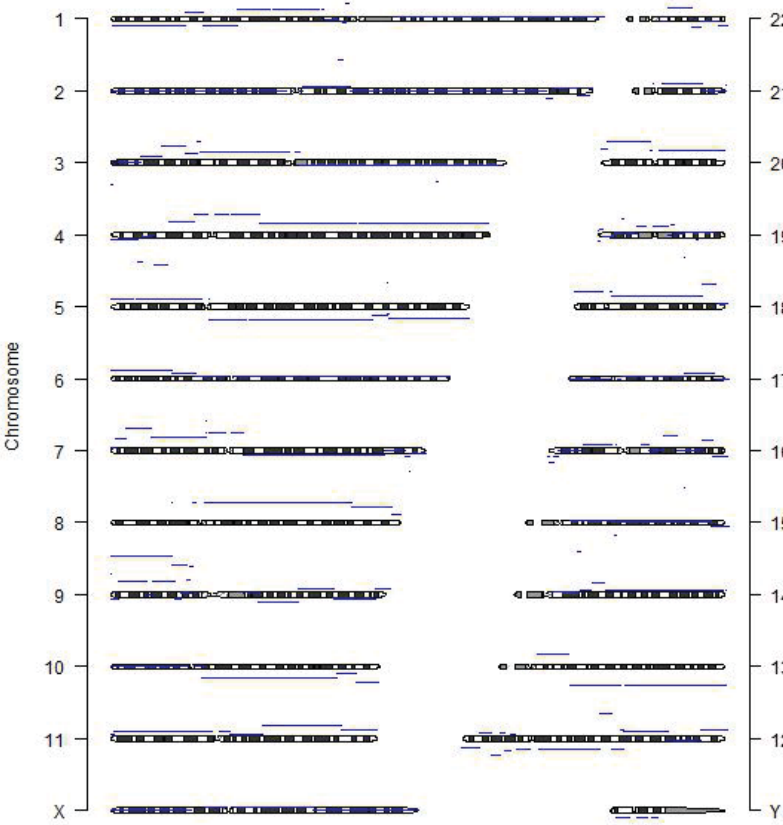

LAIR JVE114

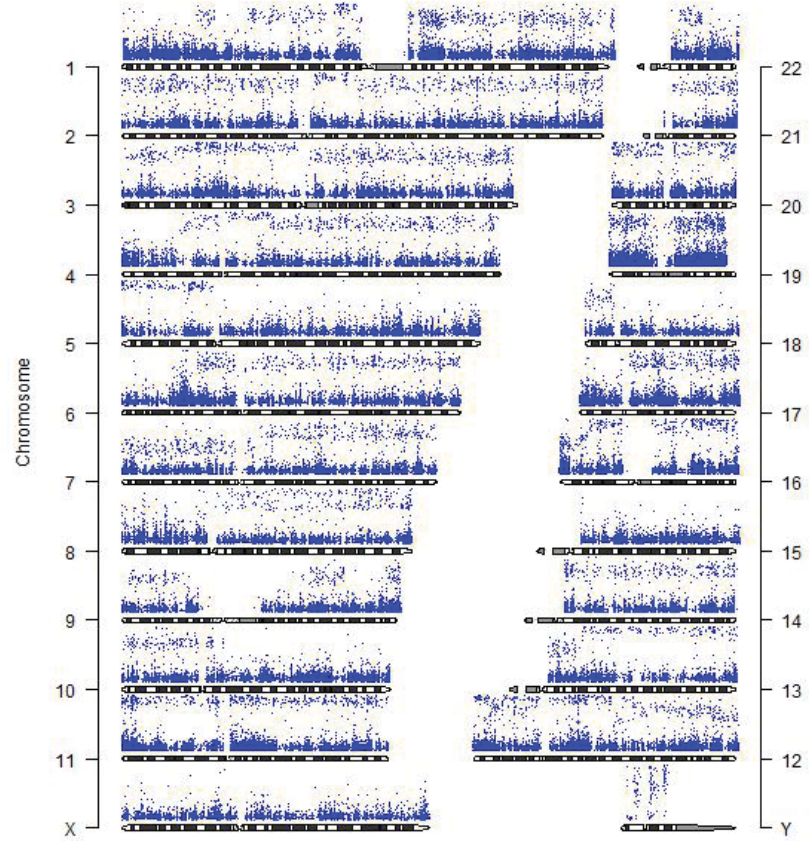

CNA JVE127

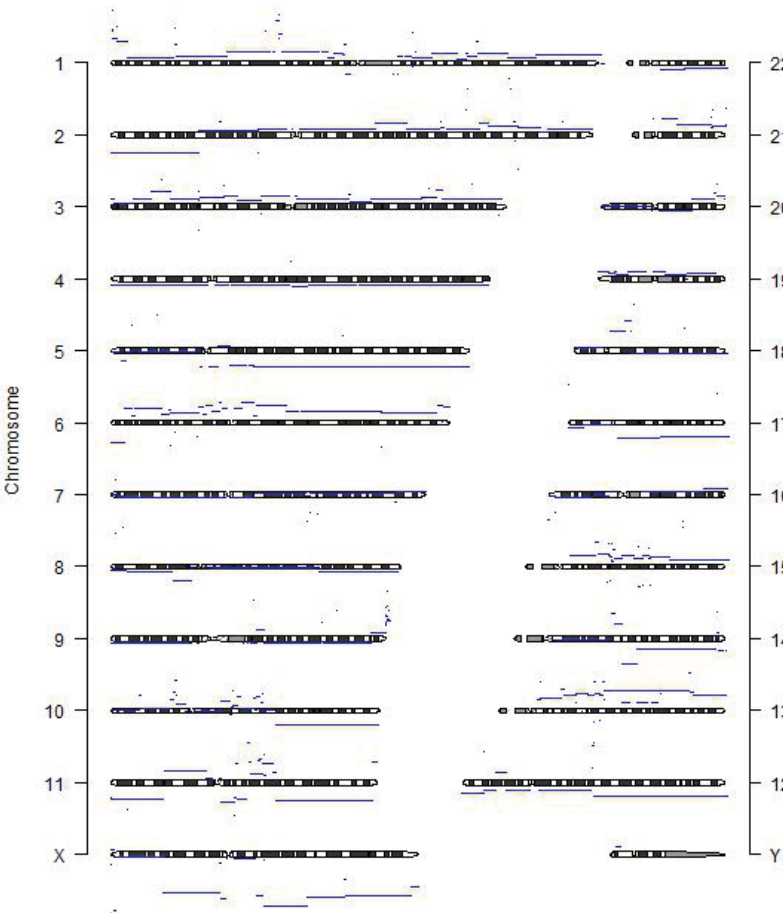

LAIR JVE127

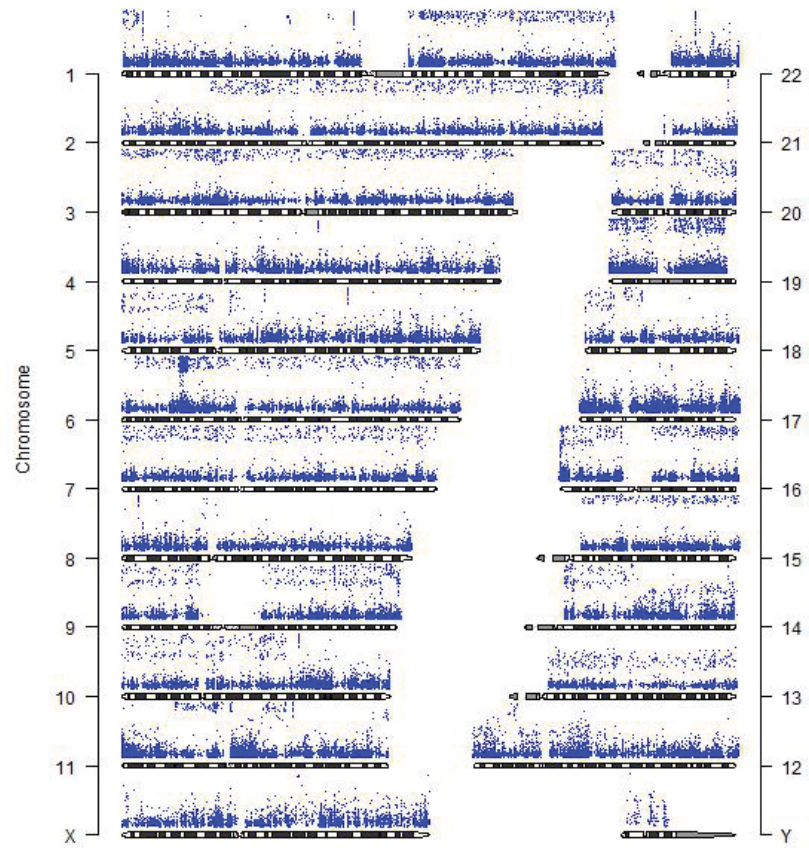

CNA JVE187

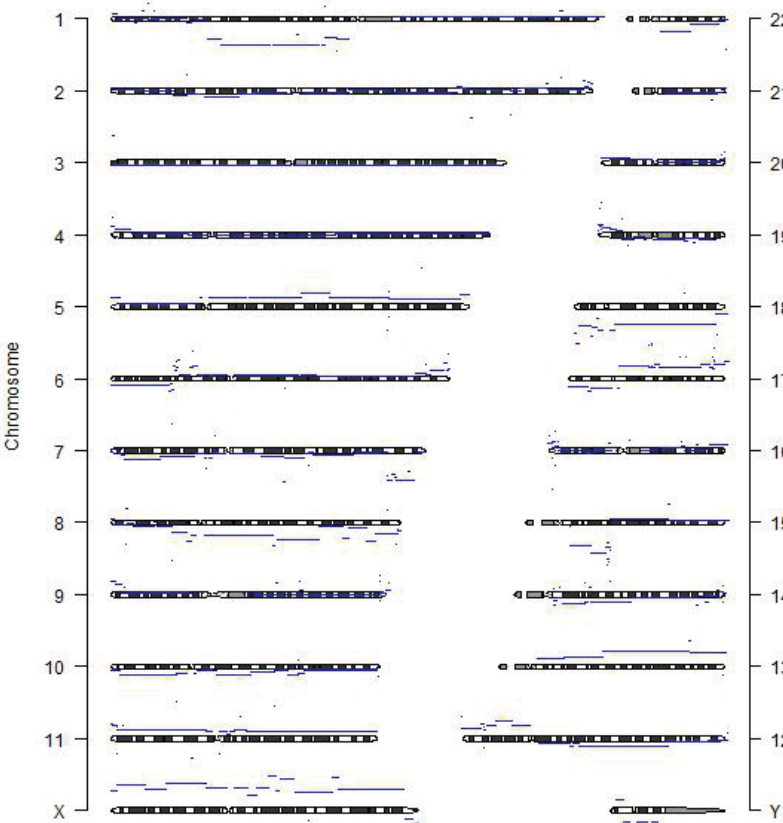

LAIR JVE187

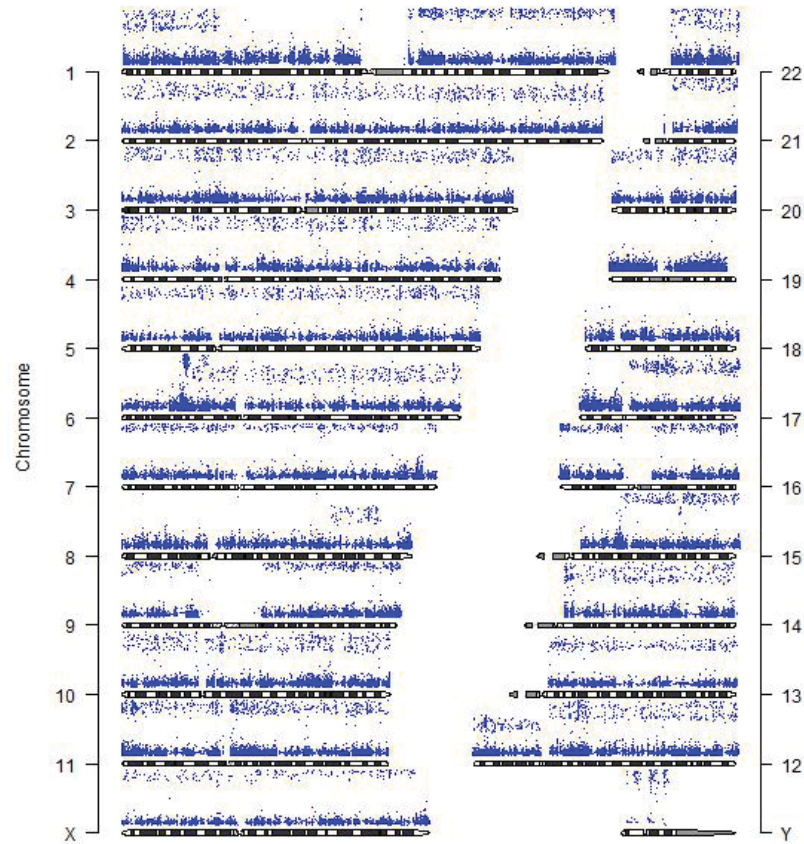



### CNA JVE192

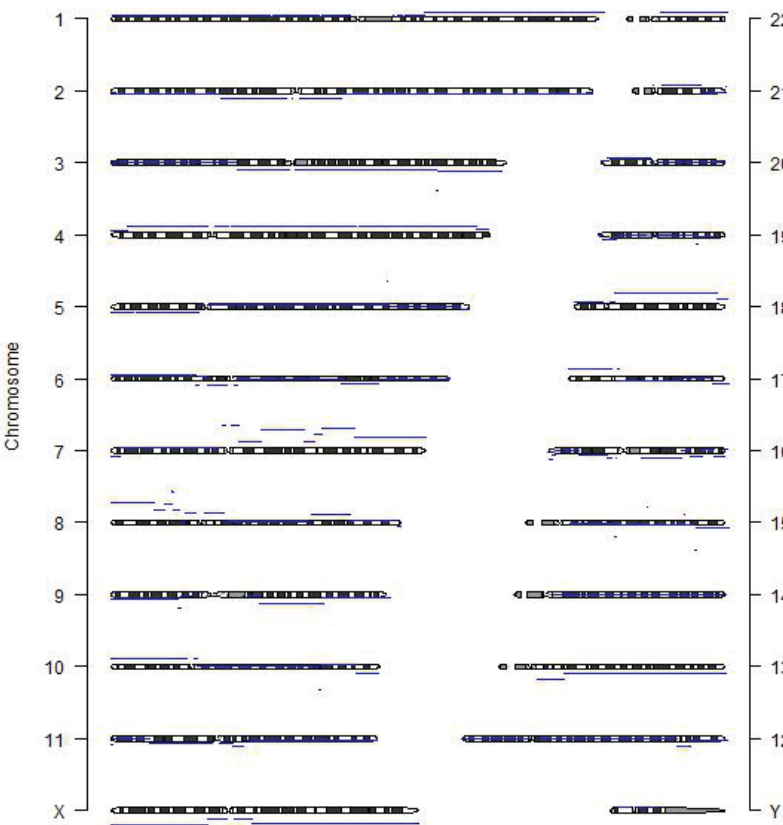

### LAIR JVE192

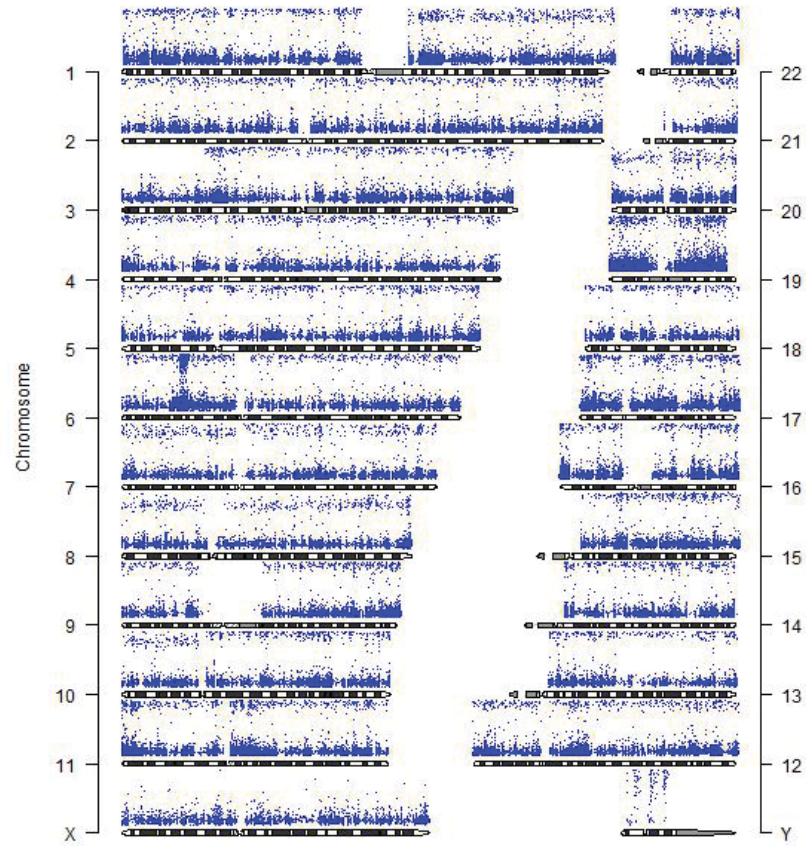

### CNA JVE207

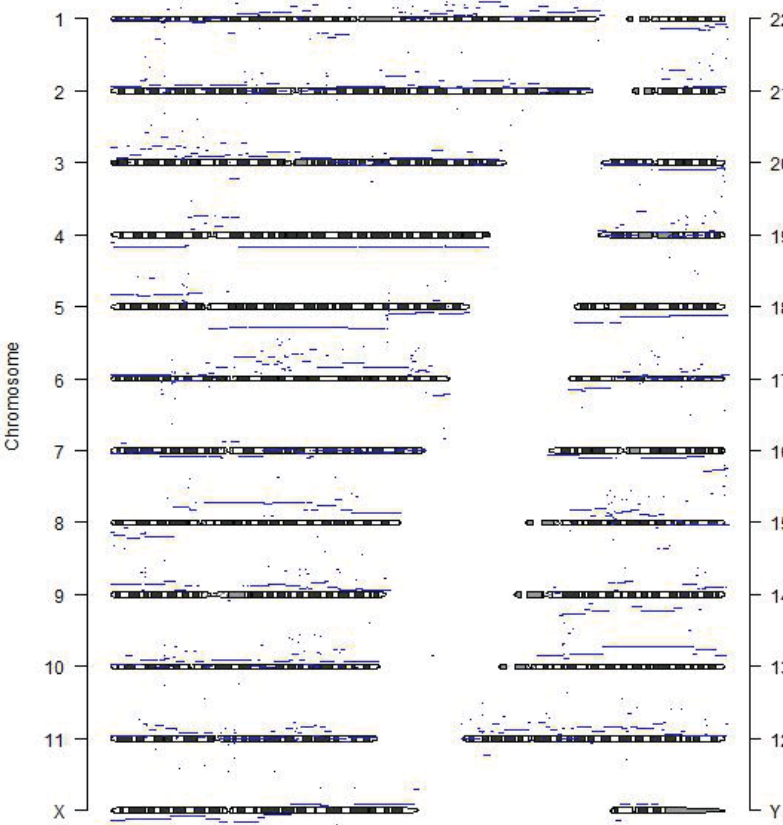

### LAIR JVE207

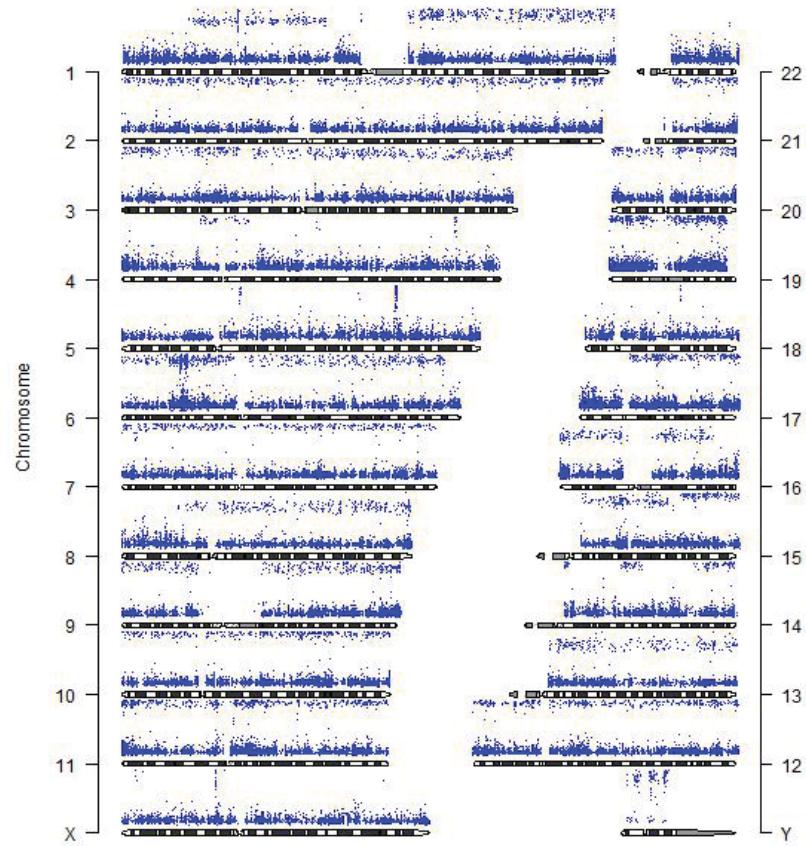

### CNA JVE22

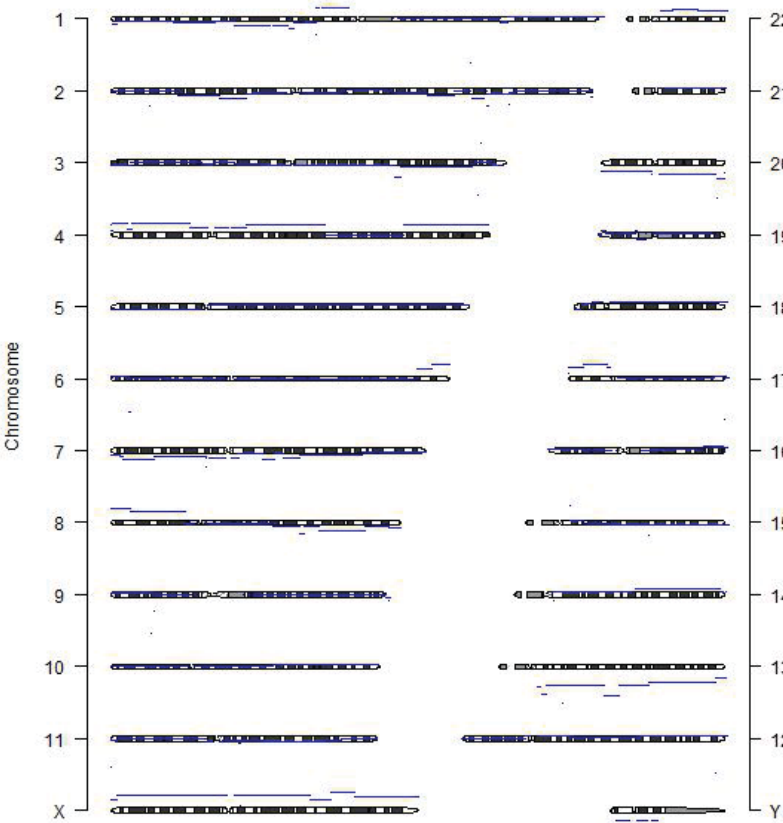

### LAIR JVE22

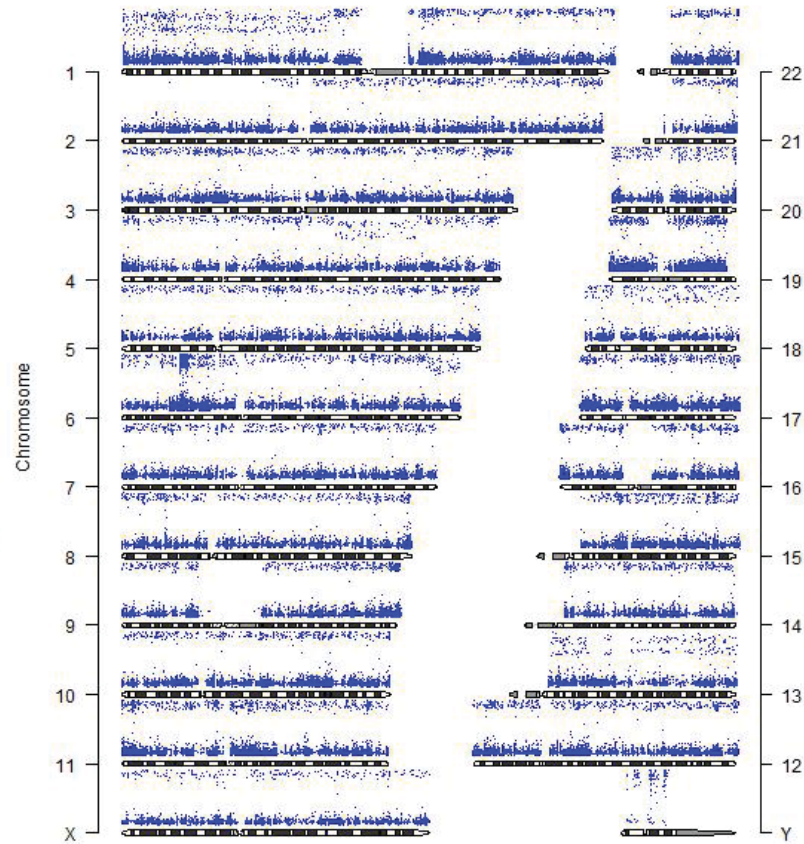

### CNA JVE241

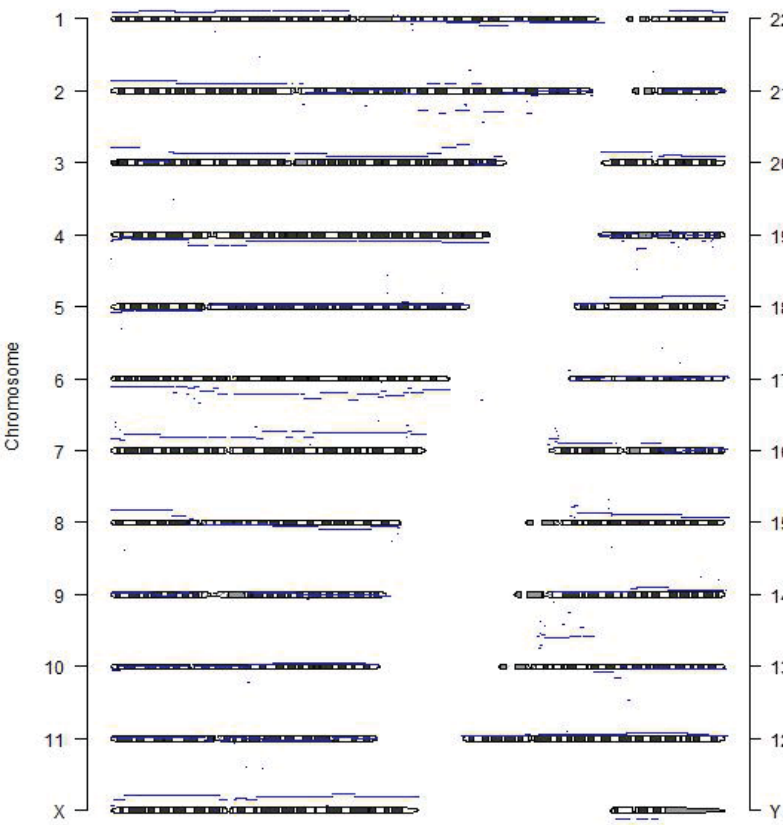

### LAIR JVE241

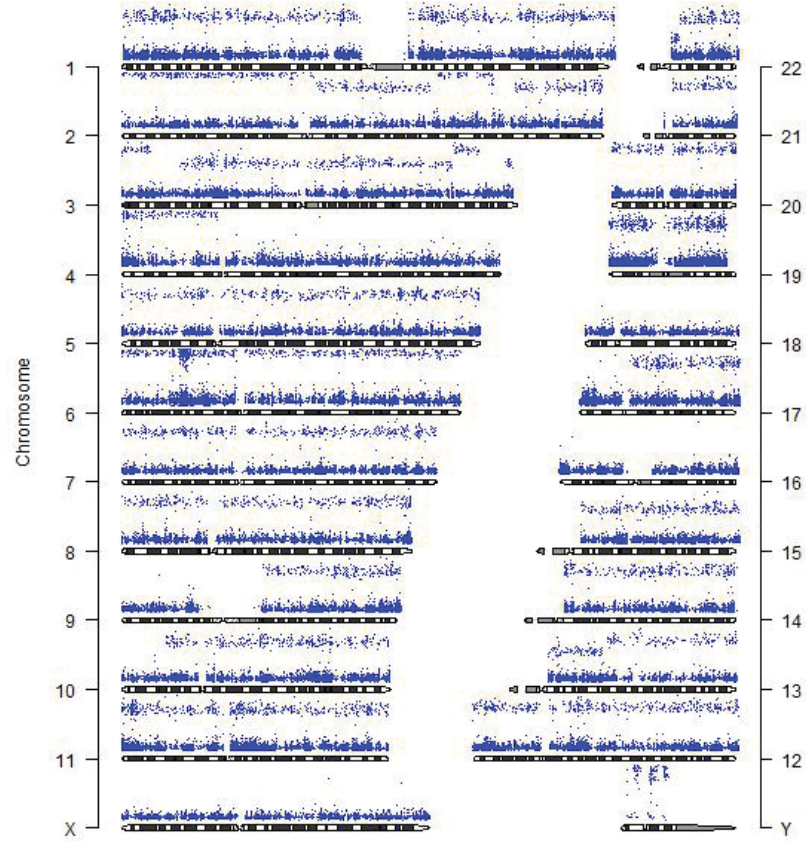

CNA JVE253

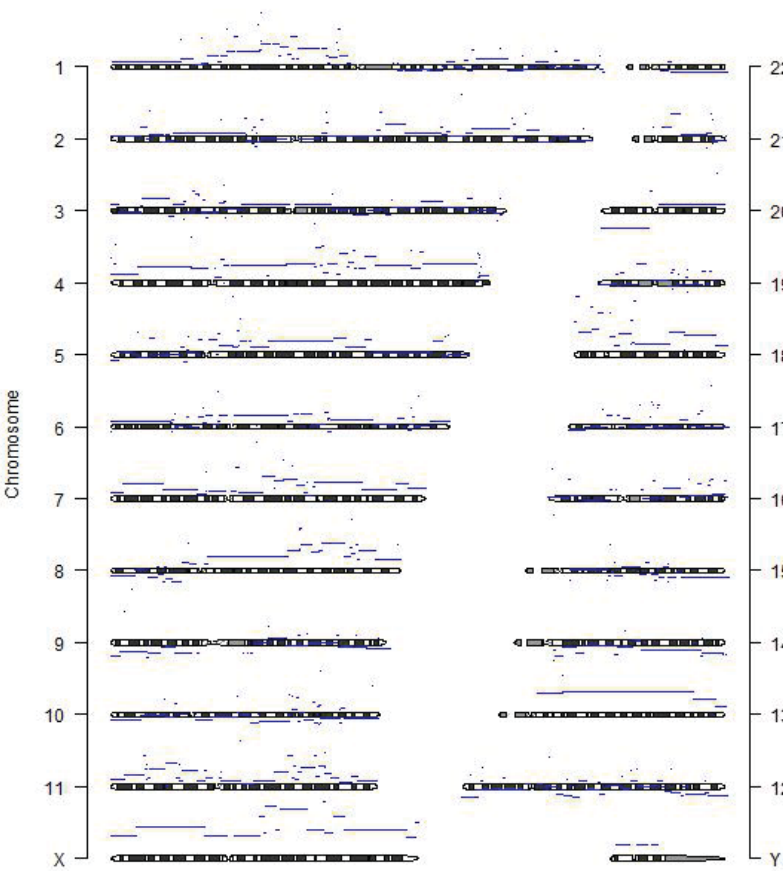

LAIR JVE253

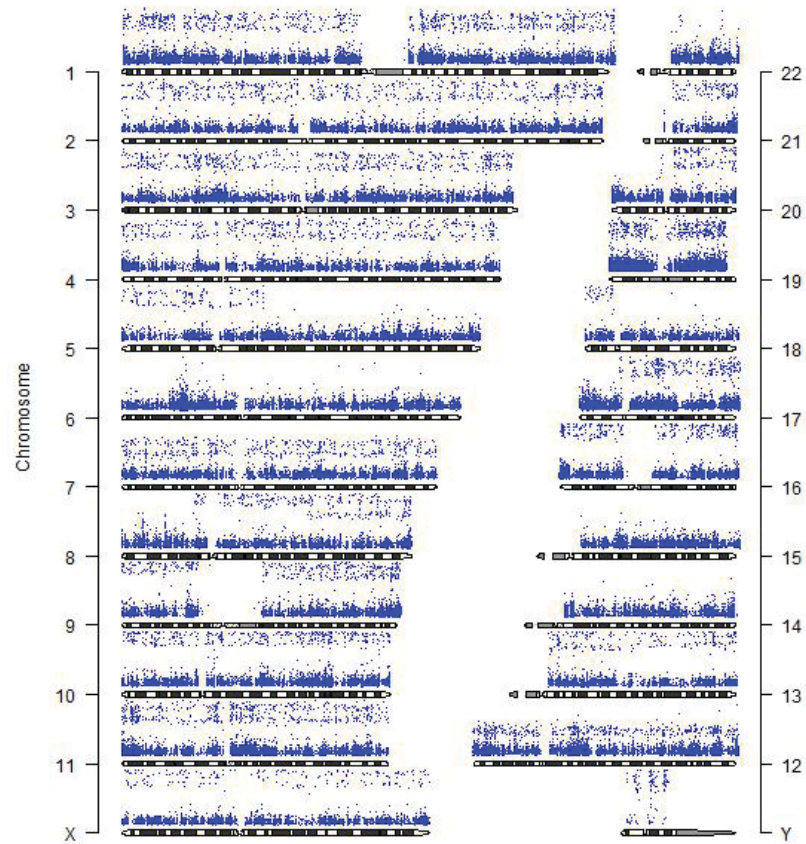

CNA JVE367

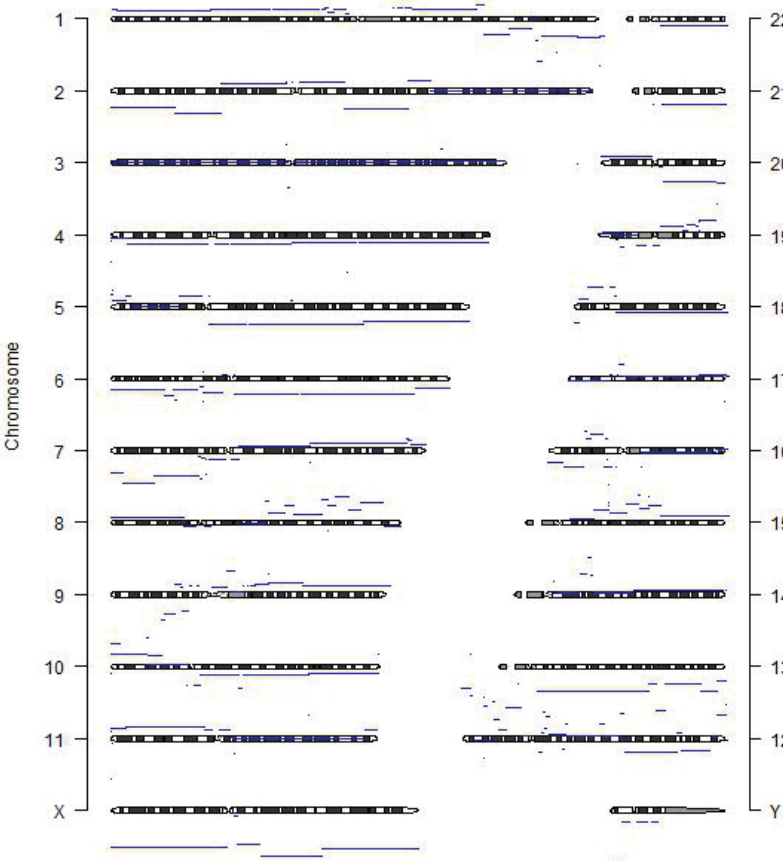

LAIR JVE367

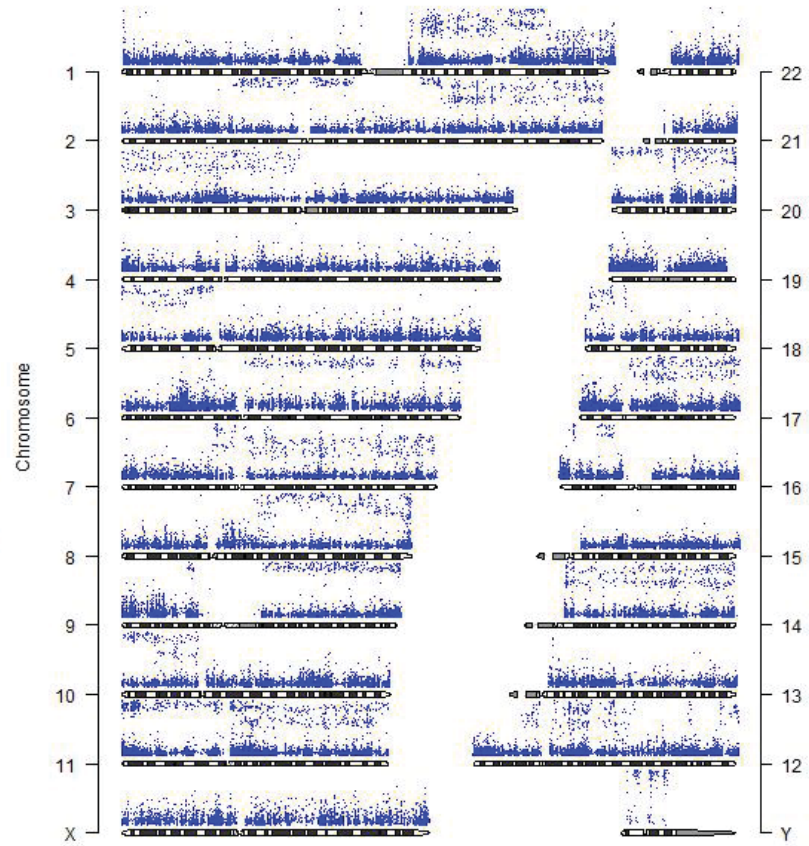

### CNA JVE371

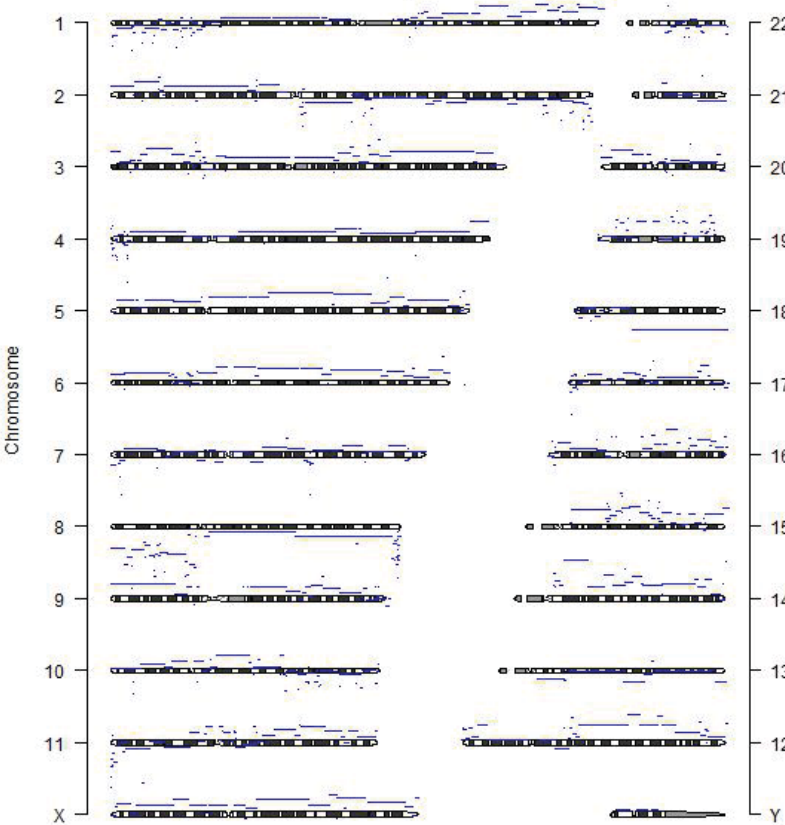

### LAIR JVE371

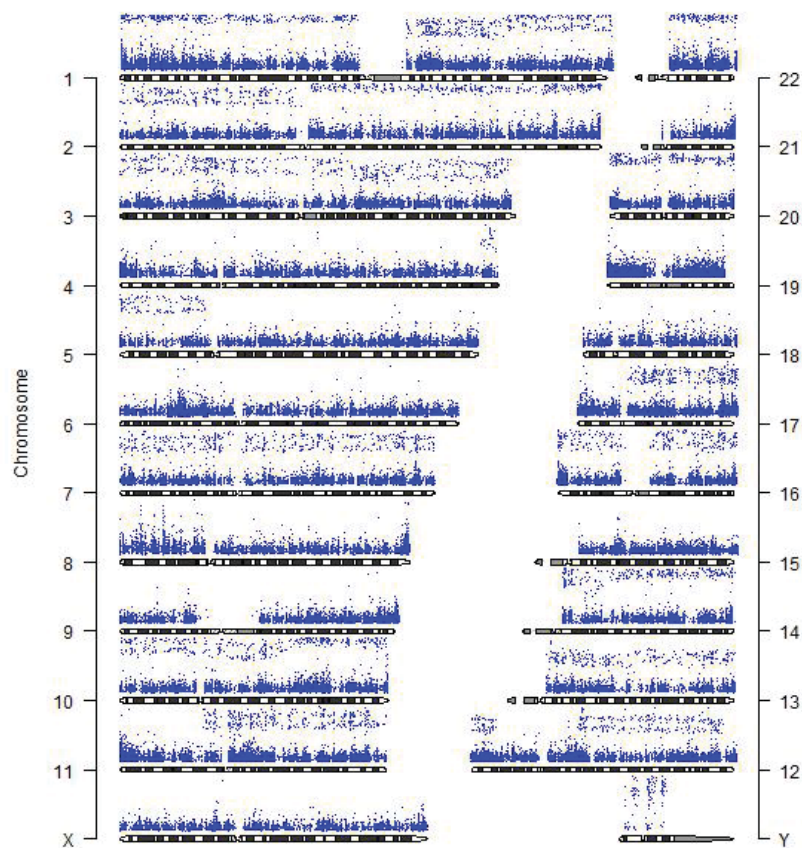

CNA JVE528

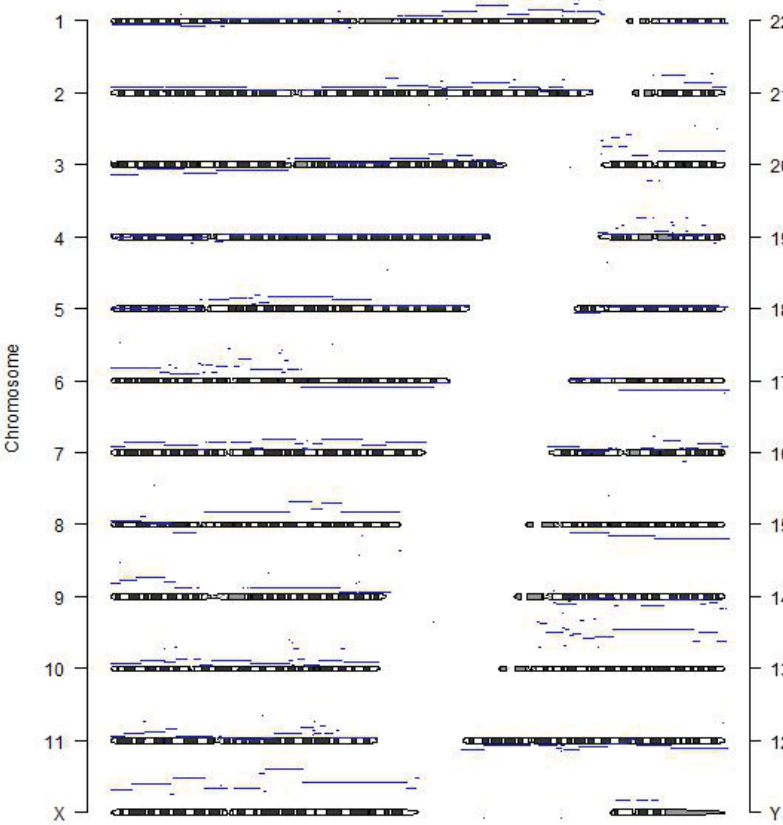

LAIR JVE528

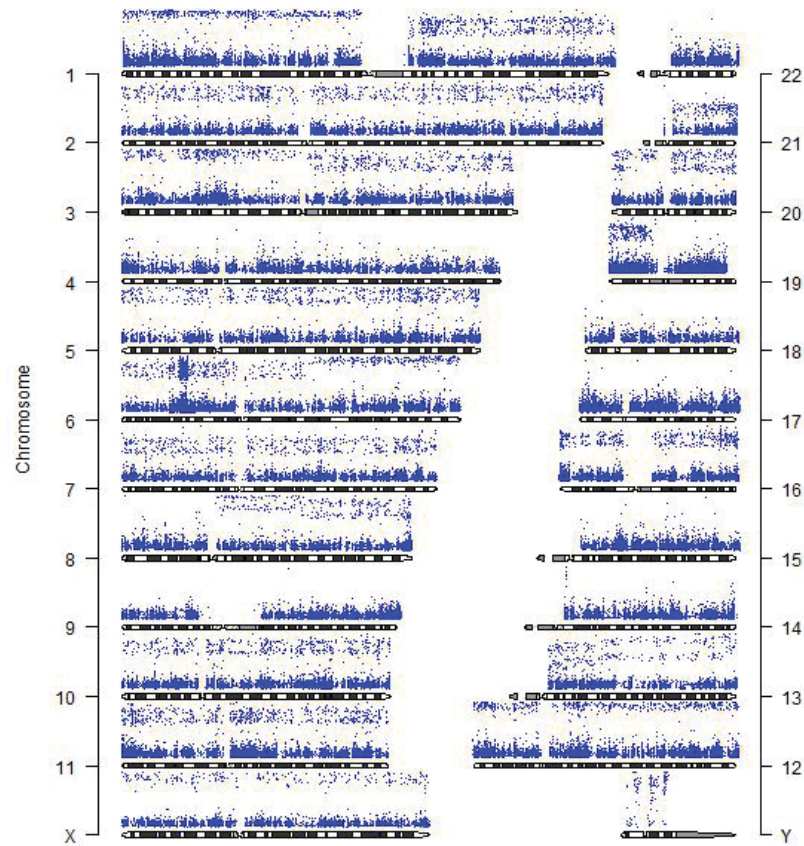



### CNA JVE774

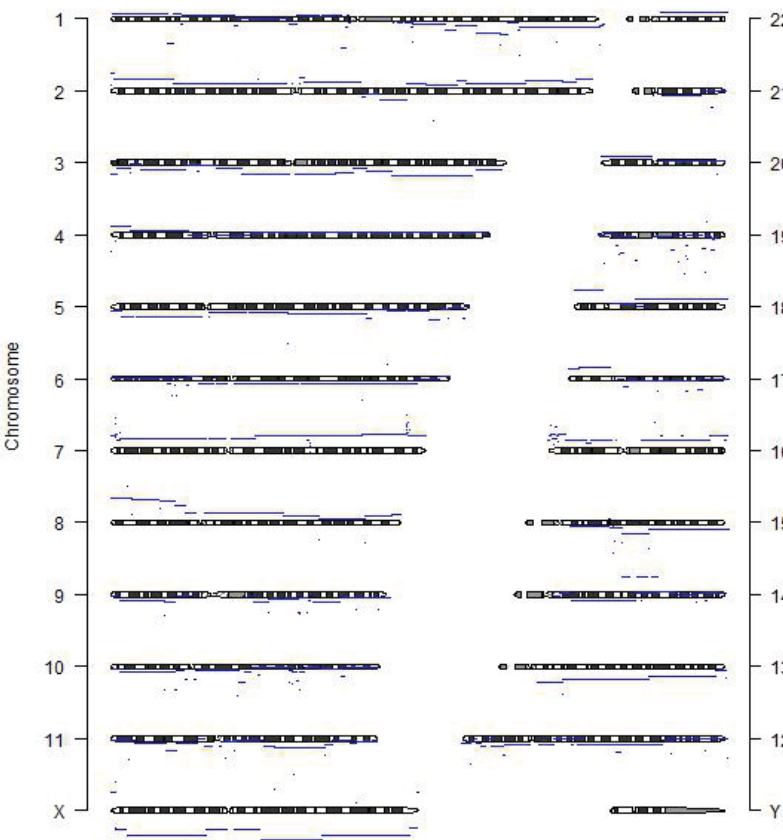

### LAIR JVE774

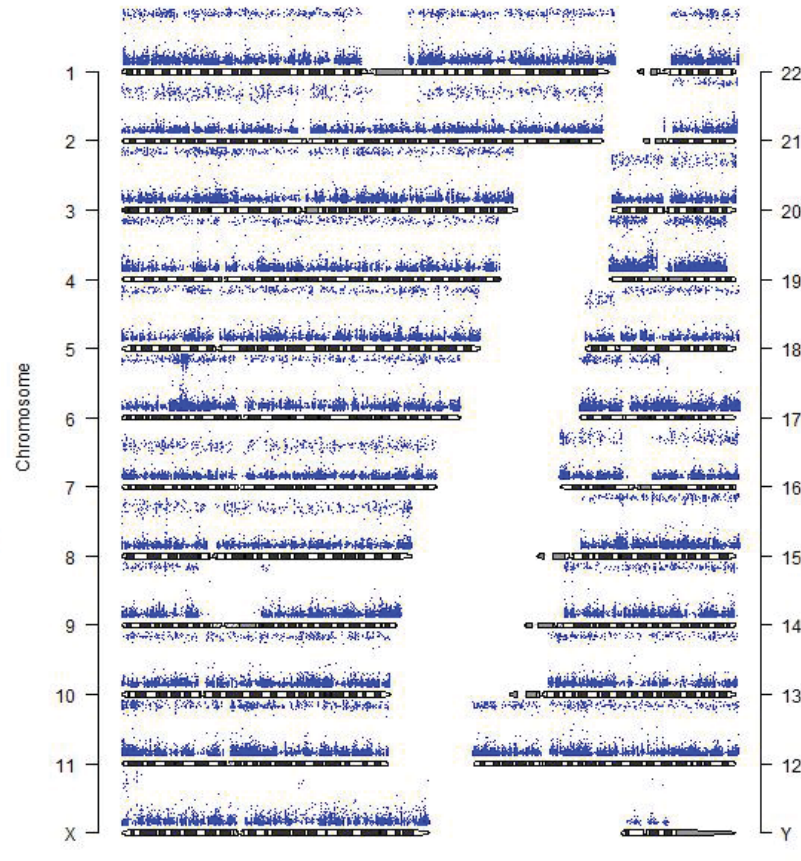

### CNA KP283T

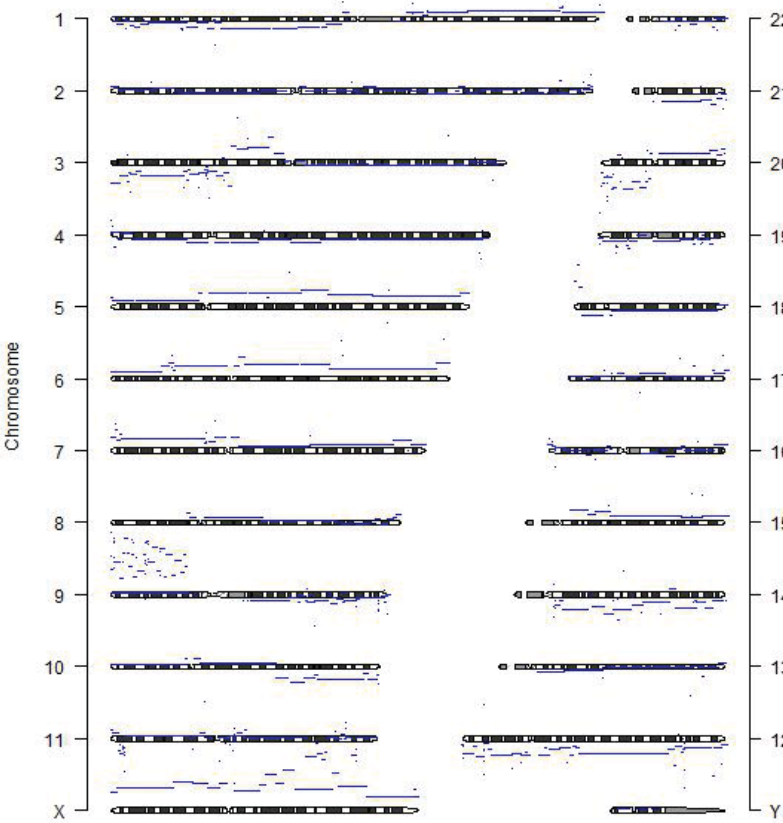

### LAIR KP283T

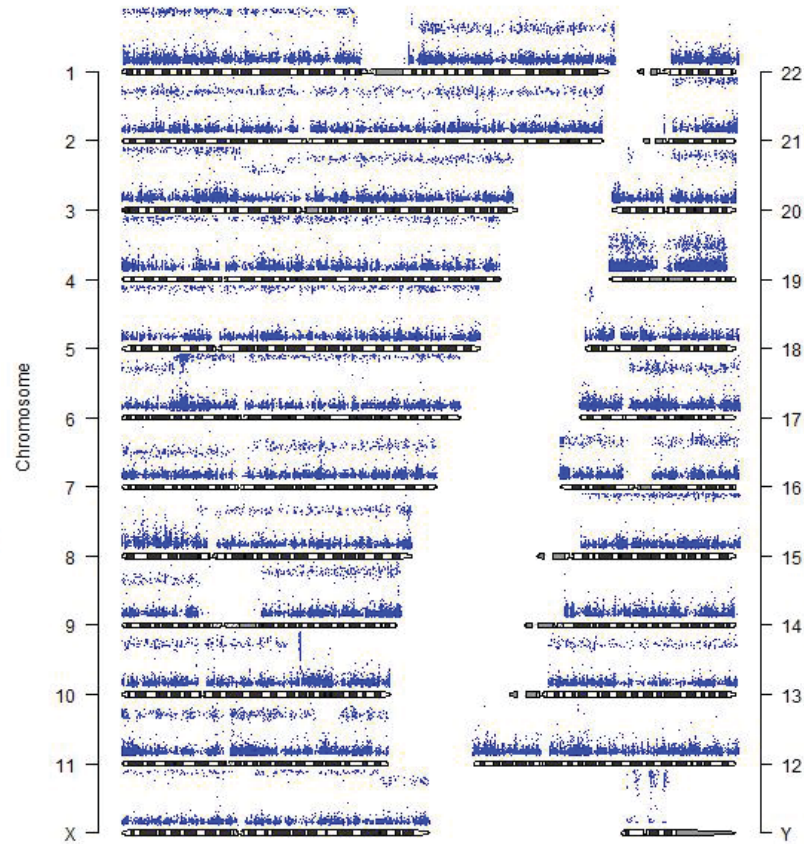

CNA KP363T

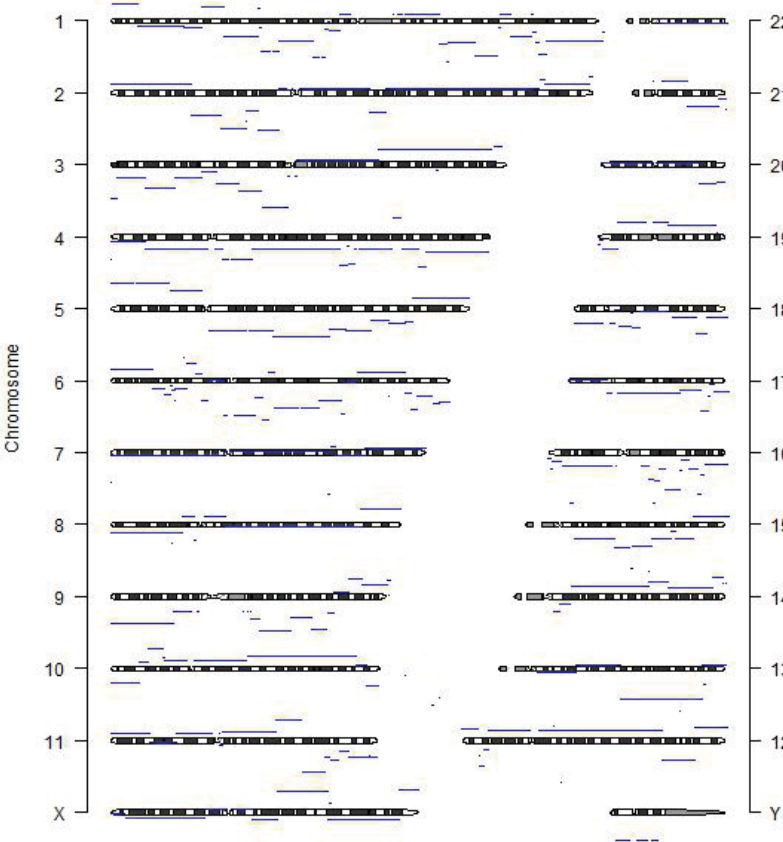

LAIR KP363T

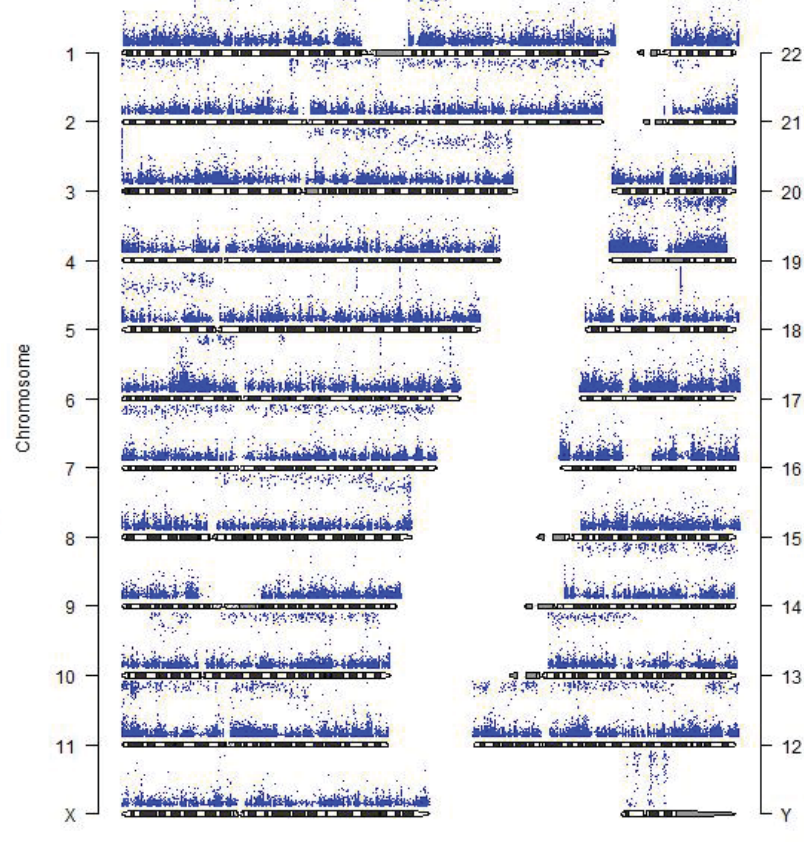

### CNA KP7038T

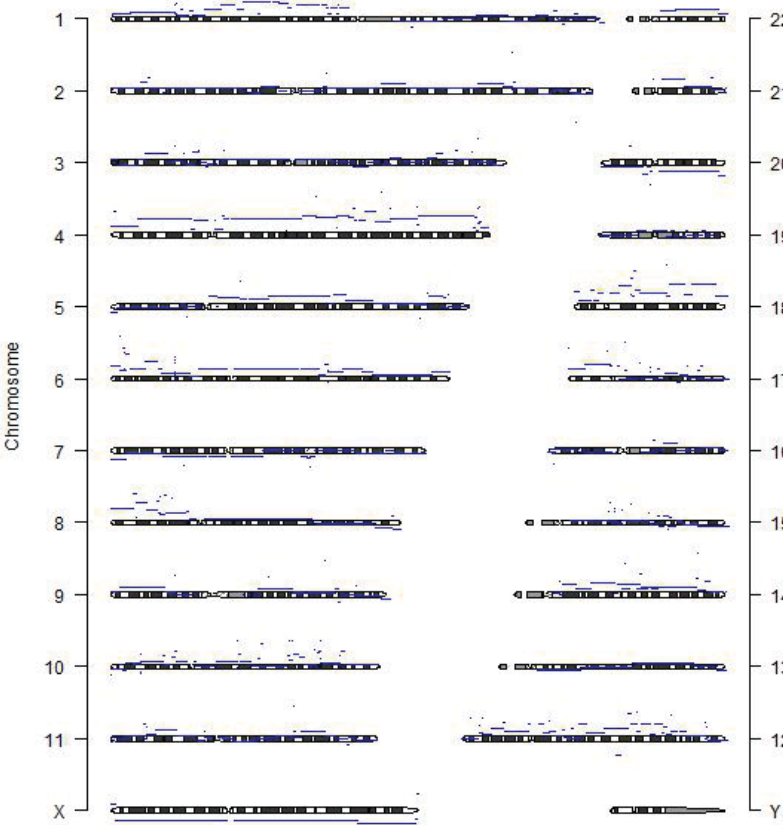

### LAIR KP7038T

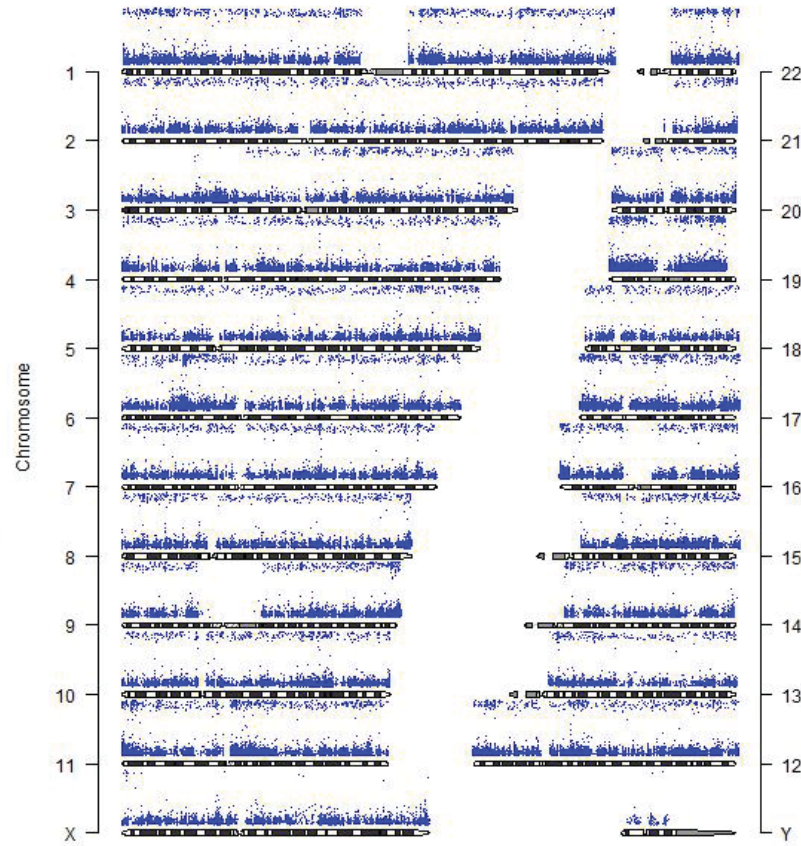

Supplement: oncotarget-07-14499-s003.pdf [file oncotarget-07-14499-s003.pdf]
