# Supplementary material for: Characterization of novel low passage primary and metastatic colorectal cancer cell lines
Source: PubMed Central journal article supplement (PMC4924731; doi:10.18632/oncotarget.7391), 2016-02-15
Supplement: oncotarget-07-14499-s001.pdf [file oncotarget-07-14499-s001.pdf]

SUPPLEMENTARY FIGURES AND TABLES

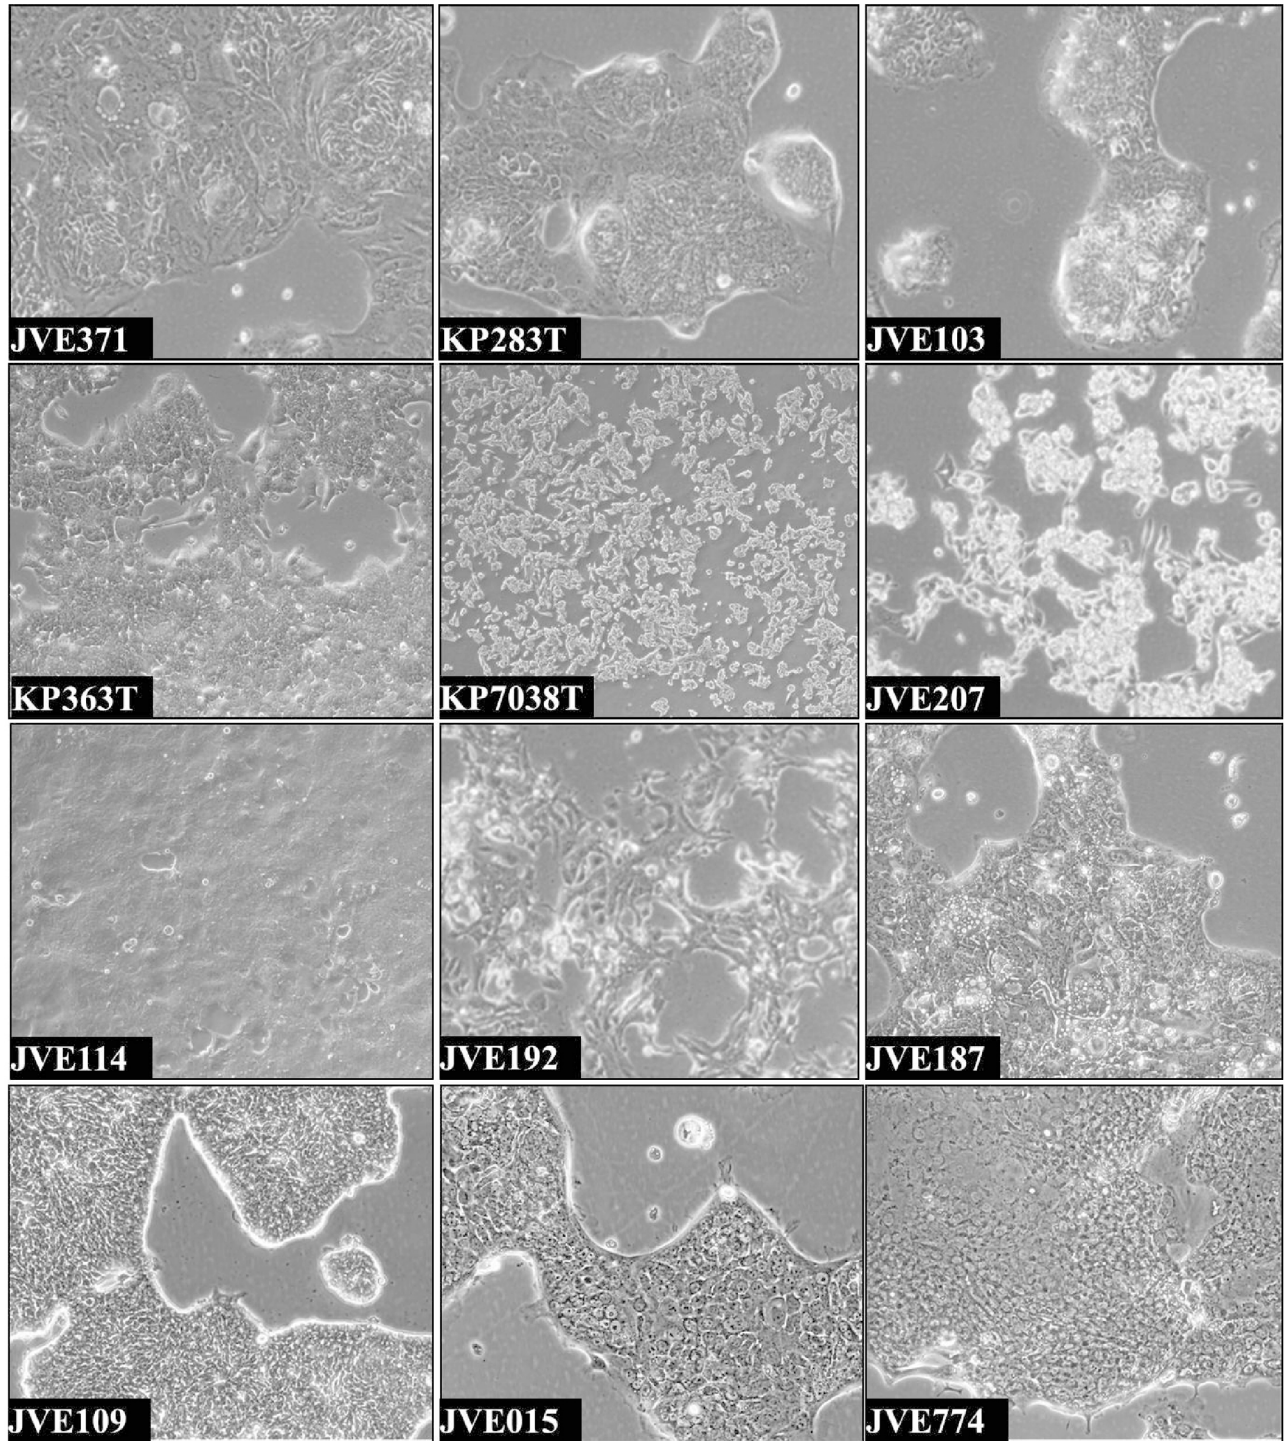

Supplementary Figure S1: Representative pictures for the remaining 12 cell lines, which were not included in Figure 1.

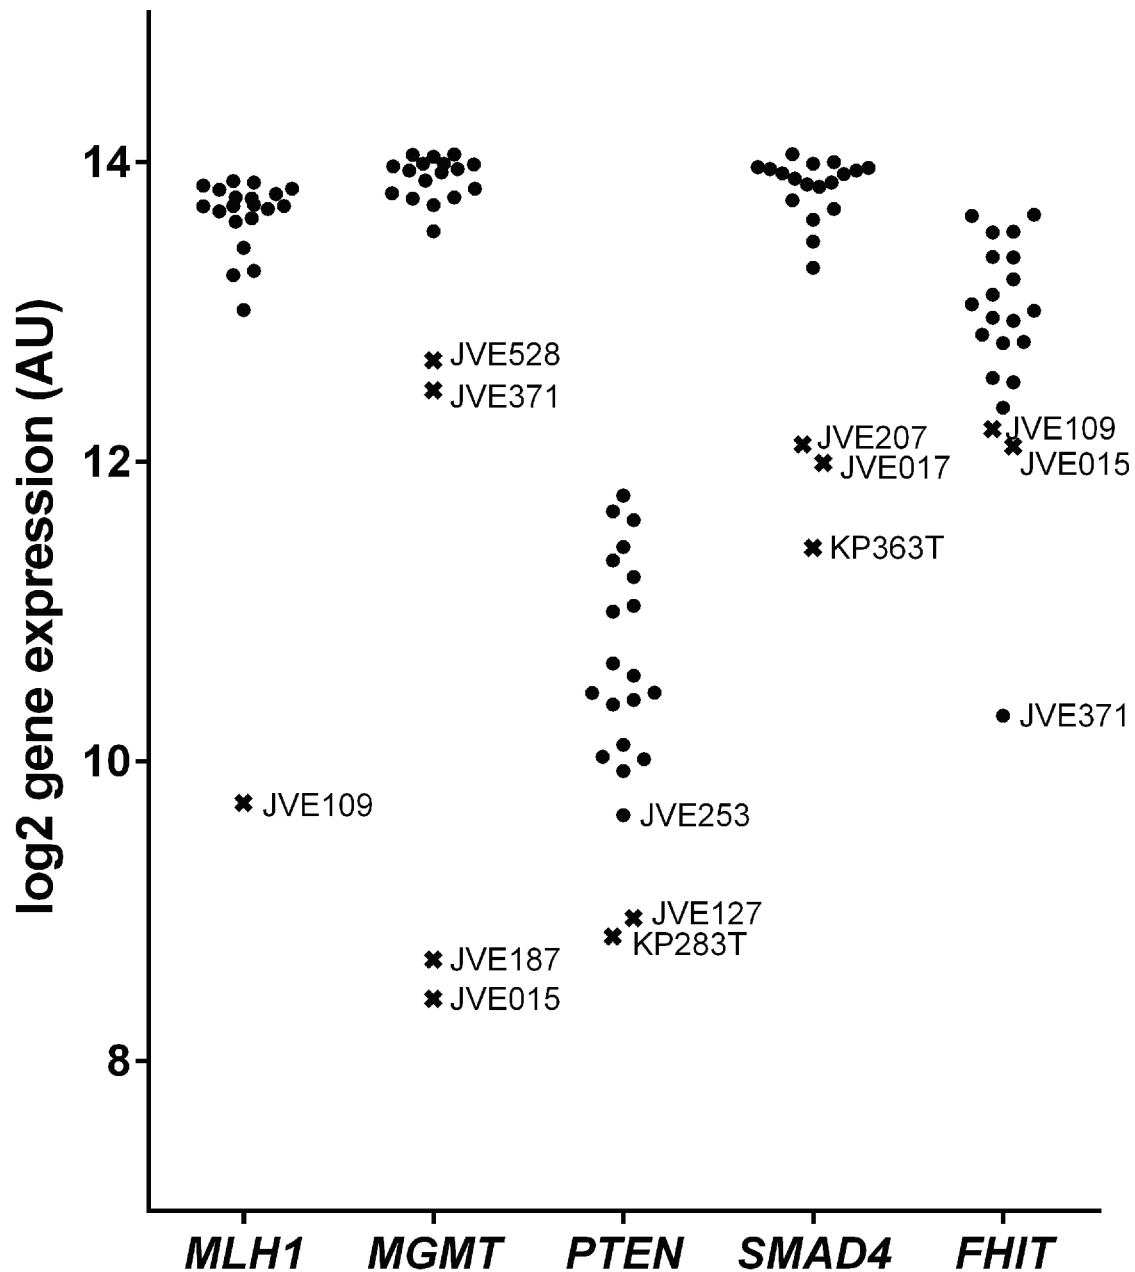

**Supplementary Figure S2: Gene expression.** Gene expression values of *MLH1*, *MGMT*, *PTEN*, *SMAD4* and *FHIT* are shown to show the effect of DNA methylation and homozygous deletions on gene expression. Cell lines with alterations (methylation or deletion) have been labelled. Gene expression of *MLH1* and *MGMT* are reduced by the presence of DNA methylation at the respective promoters. Homozygous deletion of *SMAD4* does not appear to result in a complete loss of expression. This is due to our expression analysis, selecting for probes outside of the deleted areas, as discussed in the main text.

**Supplementary Table S1: Oxaliplatin IC50 with 95% confidence interval.**  
See Supplementary File 3

**Supplementary Table S2: Cell line STR profiles as determined using the promega CellID system.**  
See Supplementary File 4

**Supplementary Table S3: Overview of genetic alterations in major CRC signaling pathways.**  
See Supplementary File 5

**Supplementary Table S4: Cancer hotspot panel v2 targets.**  
See Supplementary File 6

**Supplementary Table S5: Cell line characteristics and mutation profiles.**  
See Supplementary File 7
